# Supplementary figures and images for: Observation of a dynamic equilibrium between DNA hairpin and duplex forms of covalent adducts of a minor groove binding agent
Source: Royal Society of Chemistry journal article supplement (doi:10.1039/b816163a), 2008-11-18

Figure S1

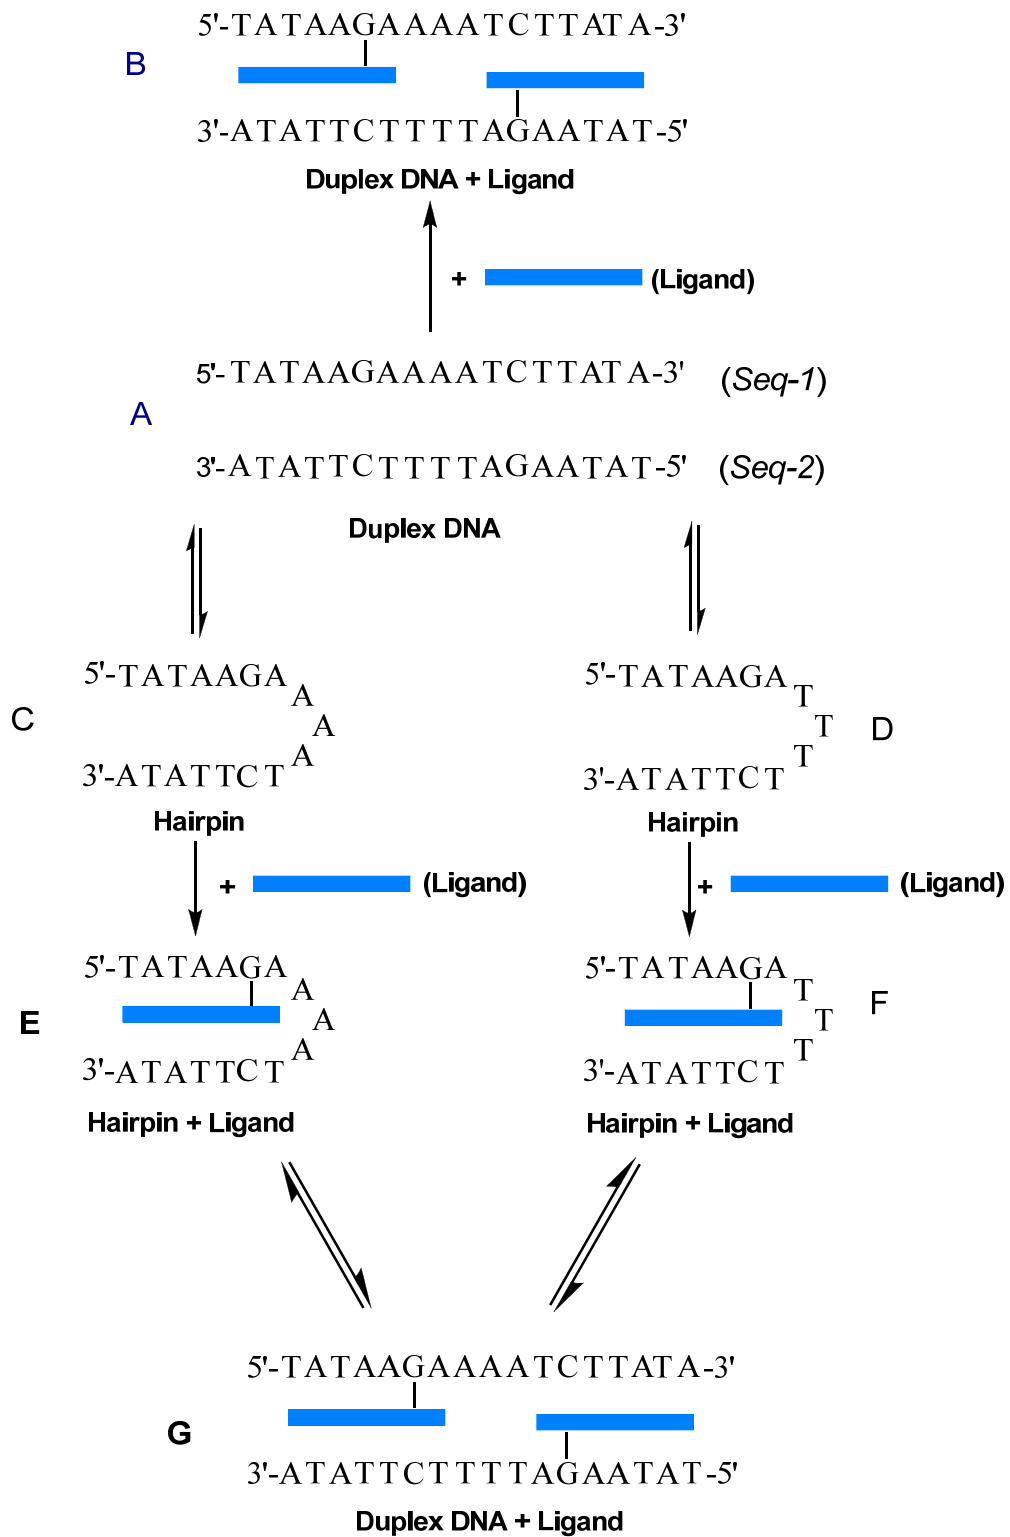

**Figure S2**

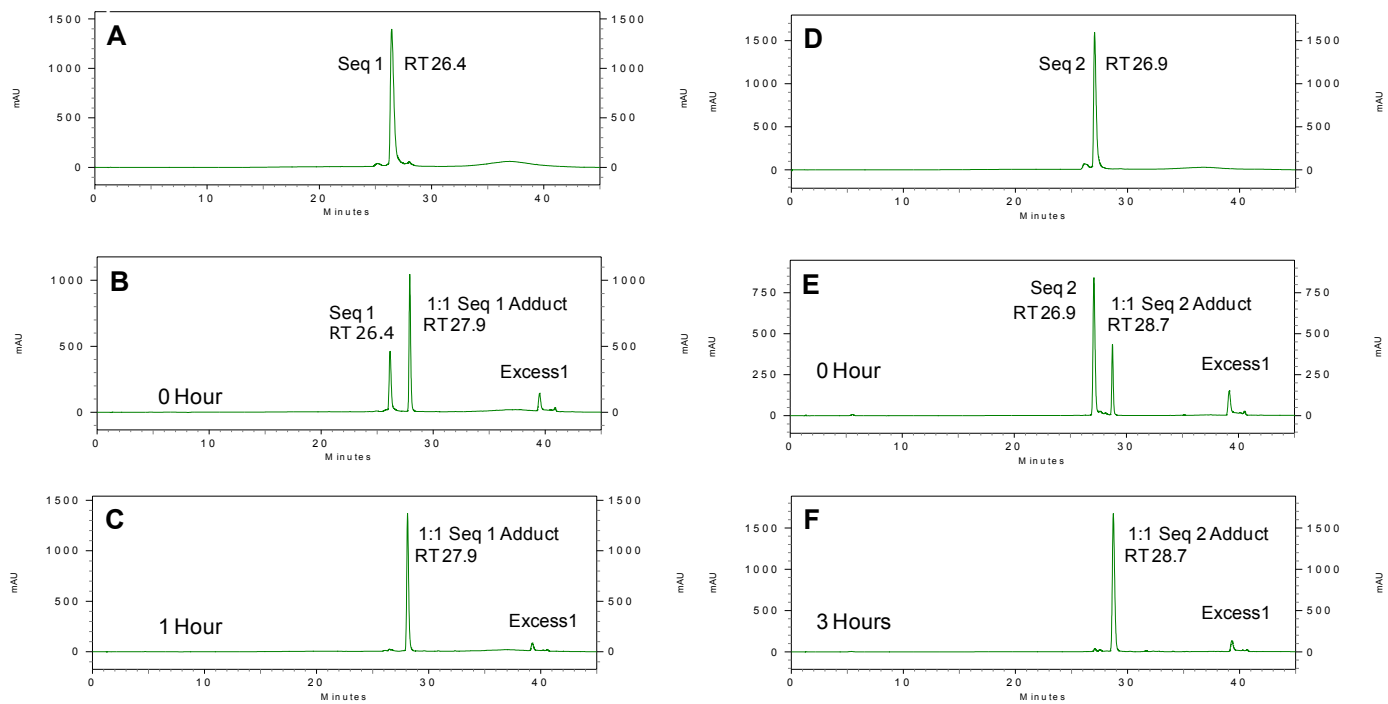

**Figure S3**

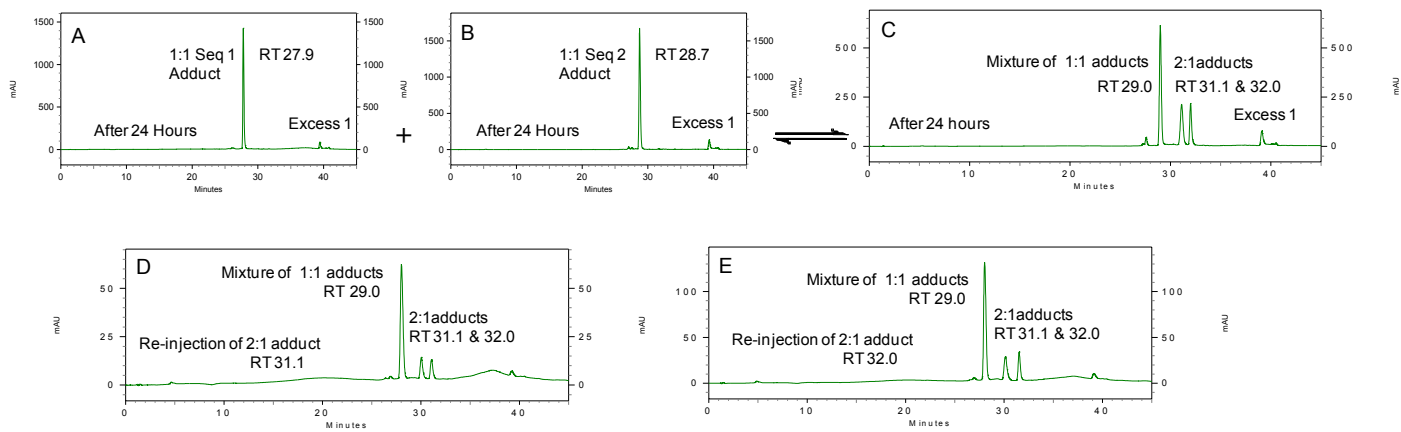

Figure S4

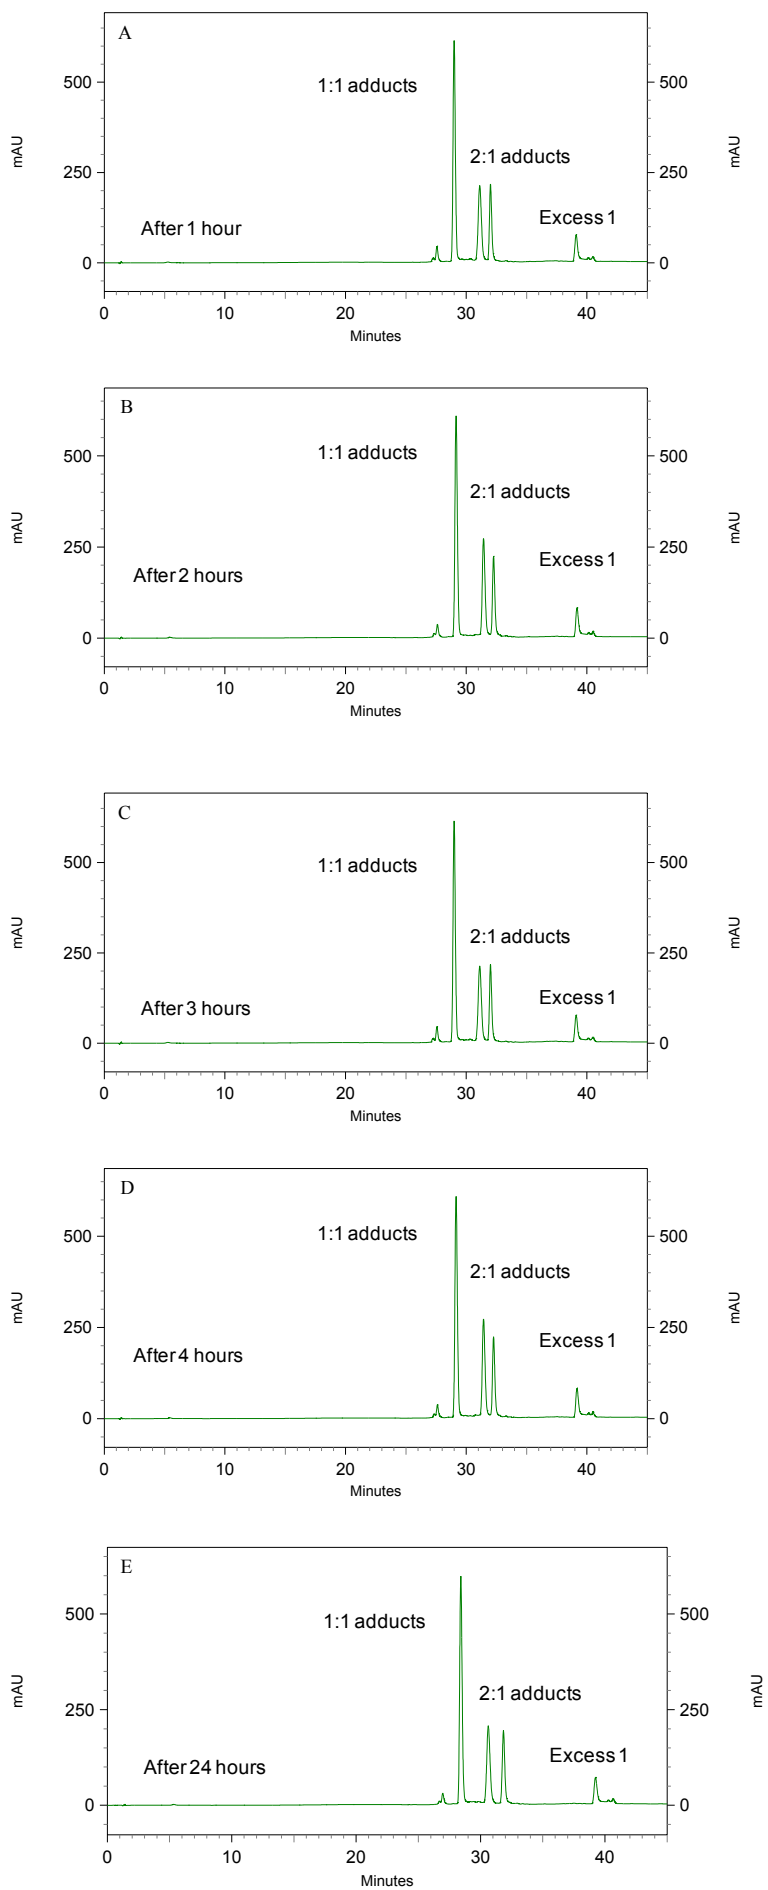

Figure S5

Voyager Spec #1=>SM25=>SM25[BP = 5199.3, 9958]

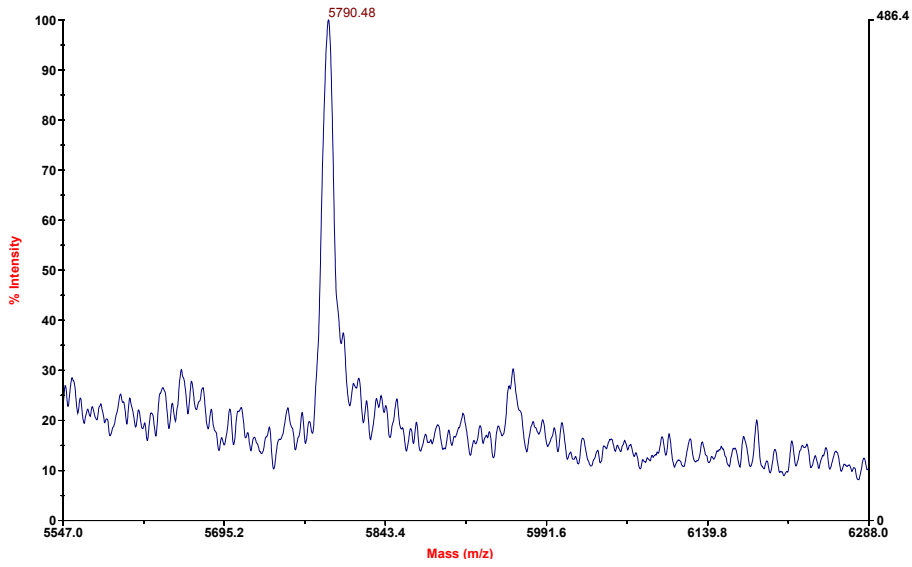

Voyager Spec #1=>NF0.7=>NF0.7=>SM5=>SM5=>AdvBC(23,0.5,0.1)[BP = 5176.8, 16563]

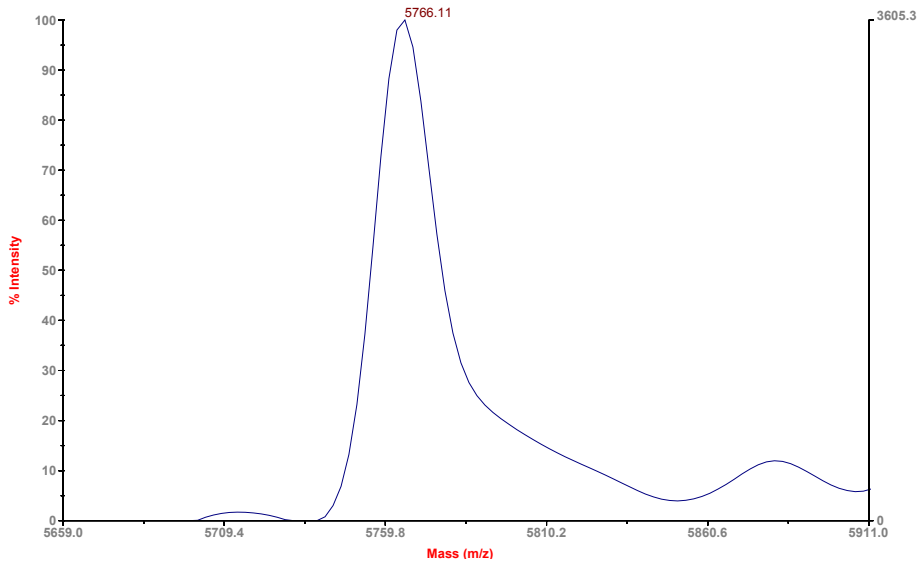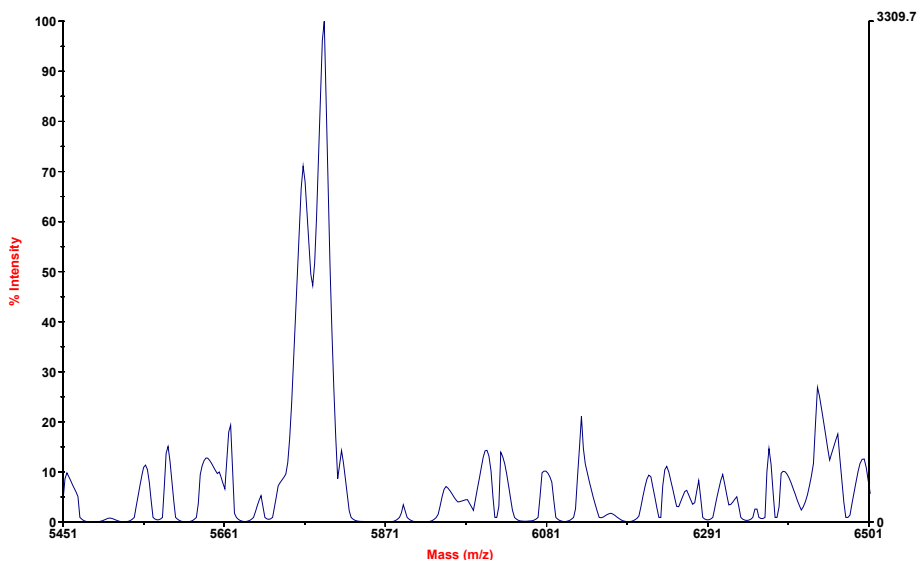

Supplement: b816163a_2.pdf [file b816163a_2.pdf]
